# Supplementary material
Source: publisher figshare collection journal article supplement (https://gsapubs.figshare.com/articles/dataset/_/12533510)
Supplement: Supplementary file 1 [file 1]

## Sheet: Table S1
Table S1. LA-ICPMS U-Th-Pb isotope and trace element data for Karamea Suite granites
							Measured isotope ratios and 1σ internal errors (%)									208Pb corrected ages and 1σ absolute internal errors (Ma)													Trace elements (ppm)
																							206Pb*/238U
Spot		Ti	T(Ti-zrn)°C	Pb*	U	Atomic	206Pb	±	207Pb	±	207Pb	±	208Pb	±		206Pb*	±	207Pb*	±	207Pb*	±		207Pb*/235U	%common	Spot				La	Ce	Sm	Eu	Dy	Lu	Zr/Hf
#	Location	(ppm)	(ɑTiO2 = 0.8)	(ppm)	(ppm)	Th/U	238U		235U		206Pb		232Th			238U		235U		206Pb*			concordance (%)	206Pb	MSWD	Age (Ma)	error		(ppm)	(ppm)	(ppm)	(ppm)	(ppm)	(ppm)
BATEMAN CREEK (P31272)
8	rim	8.87475	730.587	73.3954	1389.69	0.161255	0.0537687	0.894116	0.537946	1.44394	0.0725617	1.13381	0.0364848	1.88631		328.27	2.88095	307.019	6.95656	149.282	3.42326		106.922	2.84006	8.72668	328.27	7.43009		12.9598	35.1014	38.5209	5.13045	380.022	172.182	44.2652
31	core	bdl		333.392	6228.01	0.0773339	0.0571191	0.771688	0.428634	1.646	0.0544257	1.4539	0.0229096	2.51795		356.85	2.68142	344.64	5.27744	263.518	3.78807		103.543	0.353541	5	356.85	7.91325		1.58212	22.0909	26.7687	1.65905	589.441	432.348	34.3824
5	rim	9.21418	733.829	15.8924	275.167	0.347024	0.0571436	0.738488	0.463341	1.8973	0.0588074	1.74768	0.0187244	1.40749		357.372	2.59378	374.646	7.81627	482.685	9.14616		95.3892	0.246569	2.77874	357.372	7.89428		bdl	7.67746	3.90441	0.902714	124.613	81.93	60.0927
2	rim	3.1047	647.627	54.8603	965.983	0.20877	0.0583789	0.485983	0.436262	1.08877	0.0541988	0.974295	0.0192036	1.2036		365.264	1.73766	360.607	4.32231	331.071	3.77775		101.292	0.139343	6.04492	365.264	7.81625		bdl	7.8987	5.02888	0.784379	288.75	197.62	44.6201
9	rim	6.85832	708.874	11.1839	184.179	0.440867	0.0584964	0.600022	0.42662	2.20704	0.0528945	2.12392	0.0186771	1.37872		366.056	2.17723	354.81	8.83864	282.25	7.11443		103.17	0.117619	5	366.056	7.94146		bdl	6.69921	3.87252	0.603492	114.213	72.5066	51.7616
1	rim	9.61567	737.539	20.475	338.946	0.411018	0.0586455	0.589514	0.435044	1.64365	0.0538018	1.5343	0.0189397	1.37289		366.716	2.12513	357.295	6.62324	296.885	5.44798		102.637	0.18682	3.33403	366.716	7.9406		0.0773943	10.006	4.36882	0.866218	144.426	85.9815	61.8156
36	rim	9.4971	736.457	7.85558	131.113	0.362594	0.0590932	0.807345	0.490557	4.4313	0.0602075	4.35713	0.0190333	2.3959		369.485	2.95336	396.78	16.5772	558.906	21.4047		93.1209	0.173333	5	369.485	8.2551		bdl	3.92106	2.03091	0.344185	68.9019	44.2085	46.5791
25	rim	13.024	764.739	85.389	1458.28	0.2859	0.0590714	0.500873	0.431527	1.077	0.0529822	0.953447	0.0177766	0.959322		370.605	1.88112	373.127	7.76817	388.61	7.85434		99.324	-0.174991	7.17435	370.605	7.95762		0.154605	16.8529	11.0157	2.96193	349.503	189.617	42.3898
4	rim	10.4567	744.912	10.3918	166.459	0.477665	0.0594859	0.617003	0.479154	2.44454	0.0584198	2.3654	0.01974	1.27153		370.795	2.25481	373.882	9.57541	393.28	9.77103		99.1743	0.470527	5	370.795	8.05795		bdl	6.66189	3.62459	0.611695	99.8186	60.3925	57.4292
37	rim	bdl		74.5242	1275.27	0.309245	0.0588897	0.647498	0.441801	1.42622	0.0544109	1.27077	0.0158135	2.02727		371.46	2.35366	407.287	5.62938	615.688	7.13738		91.2034	-0.722608	6.37918	371.46	8.09945		1.03948	13.4697	11.2763	0.790863	175.734	92.3553	40.7268
38	rim	bdl		44.8385	744.292	0.421202	0.0589886	0.610362	0.4369	1.60952	0.0537171	1.4893	0.0158835	1.31901		372.765	2.27272	413.484	8.2288	647.47	11.2028		90.1523	-0.917284	4.18471	372.765	8.10243		0.117923	17.0731	8.70238	1.38219	286.911	156.445	41.1159
18	rim	9.53582	736.811	30.1021	466.509	0.62738	0.0594774	0.858525	0.447672	2.23068	0.0545891	2.05885	0.0179787	1.32552		373.645	3.17032	392.299	10.2241	503.637	11.9845		95.2449	-0.331263	4.42149	373.645	8.41552		bdl	11.5801	14.2191	2.723	337.832	147.053	64.1454
7	rim	6.74387	707.489	8.09636	135.629	0.315666	0.0596735	1.12808	0.418262	3.44747	0.0508354	3.25769	0.0180962	2.31542		374.123	4.12312	361.703	11.8054	283.143	9.16628		103.434	-0.133302	2.75505	374.123	8.82756		bdl	4.58272	2.00984	0.442597	62.868	41.3016	54.3012
19	rim	6.45287	703.877	45.6191	739.137	0.442142	0.059719	0.931968	0.442987	1.70291	0.0537994	1.42525	0.018048	1.60258		374.407	3.62124	379.226	17.5295	408.504	18.328		98.7292	-0.134993	5	374.407	8.60996		bdl	15.3655	10.5486	1.86652	283.592	145.724	55.6605
30	rim	7.44492	715.685	65.0376	1104.15	0.272021	0.0596587	0.450713	0.436826	1.10695	0.0531047	1.01103	0.0177078	1.04207		374.549	1.74137	382.018	8.37464	427.359	9.02264		98.0447	-0.275335	5.92207	374.549	8.00604		bdl	15.522	6.76318	1.18354	299.067	185.118	44.7598
10	rim	10.2244	742.927	13.8566	222.203	0.44094	0.060065	0.620243	0.457764	1.96274	0.0552738	1.86216	0.0193866	1.44289		375.256	2.29881	372.012	8.36022	352.122	7.76228		100.872	0.209186	2.41556	375.256	8.15965		bdl	7.30928	4.77855	0.802626	143.265	89.73	54.5503
16	rim	14.4494	774.39	13.9429	217.336	0.606607	0.0595718	0.740427	0.437198	3.00537	0.0532275	2.91273	0.0174474	1.38128		375.271	2.83396	399.538	14.2981	542.283	17.8924		93.9262	-0.62085	2.4725	375.271	8.32654		bdl	8.3612	7.11823	1.49879	181.739	94.2074	63.0019
27	rim	9.6358	737.722	40.2955	647.616	0.453167	0.0600327	0.780951	0.472302	1.90038	0.0570599	1.7325	0.0181989	1.56333		376.622	2.8916	403.717	8.3868	561.683	10.3129		93.2887	-0.218612	4.41491	376.622	8.3728		bdl	14.9859	7.60176	1.5407	299.569	156.132	53.4986
26	rim	4.0164	666.668	40.3449	674.056	0.304651	0.0600711	0.655293	0.440677	1.47375	0.0532051	1.32005	0.0178201	1.22873		377.239	2.51519	387.233	10.756	447.209	11.8275		97.4192	-0.323389	7.35458	377.239	8.26263		bdl	10.886	7.51776	1.18557	309.081	190.022	42.0041
17	rim	bdl		57.3248	957.843	0.288884	0.0602844	0.675131	0.43598	1.1597	0.0524518	0.942918	0.0183499	1.29403		377.734	2.49929	372.763	5.68331	342.234	4.90782		101.334	-0.103532	6.90359	377.734	8.26764		bdl	12.8999	3.57104	0.570666	135.674	85.7226	46.518
13	rim	8.77471	729.612	12.0391	196.717	0.337128	0.0607122	0.795067	0.469622	2.26217	0.056101	2.11785	0.0195004	1.34441		379.397	2.94455	383.181	8.3435	405.906	8.32802		99.0124	0.151365	3.37203	379.397	8.44545		0.119087	5.02812	3.66835	0.726552	111.521	75.3615	59.3631
32	core	bdl		43.4112	695.44	0.390351	0.0610619	0.749735	0.429816	1.8211	0.0510518	1.65961	0.0188649	1.70533		382.27	2.8809	365.729	11.4138	262.563	8.40786		104.523	-0.0509597	3.49859	382.27	8.47982		bdl	13.4782	6.82157	1.20668	246.511	151.969	46.9164
35	rim	9.60172	737.412	23.4687	374.133	0.386579	0.061438	0.507952	0.454908	1.34886	0.0537014	1.24956	0.0190696	1.15793		384.577	1.91778	383.67	5.68536	378.461	5.38189		100.236	-0.0568497	2.5225	384.577	8.2496		bdl	10.743	4.97852	1.09167	176.118	110.989	56.326
40	core	bdl		80.3014	1336.15	0.172463	0.0624617	0.486301	0.454558	0.888394	0.0527806	0.743474	0.0198155	0.880301		390.472	1.8717	378.97	5.18301	309.553	4.16862		103.035	0.0281798	7.75298	390.472	8.35884		bdl	9.79466	3.2866	0.418866	178.925	128.895	39.0315
23	rim	6.23613	701.097	19.7791	302.785	0.48475	0.0623606	0.748498	0.465964	2.05002	0.0541927	1.90849	0.0191363	1.46196		390.533	2.87808	396.25	9.12879	429.508	9.3756		98.5574	-0.150022	2.5344	390.533	8.64124		bdl	9.05846	6.97463	1.57458	165.165	87.1365	59.126
29	core	10.9281	748.834	13.9594	202.454	0.652978	0.0626738	0.760288	0.455327	2.50498	0.052691	2.38681	0.0200168	1.40688		391.608	3.17752	377.384	19.2529	291.349	15.3235		103.769	0.0679063	5	391.608	8.76641		0.127613	8.85182	9.51023	1.92679	181.883	82.5846	59.8912
39	core	8.60746	727.961	14.766	227.719	0.415141	0.063192	1.12348	0.443706	2.68953	0.0509251	2.44363	0.0185346	1.48205		396.393	4.41552	392.218	14.5672	367.91	13.3553		101.064	-0.361288	4.5213	396.393	9.37504		bdl	6.84847	6.21364	1.17872	147.233	80.3917	47.1958
14	core	7.74414	718.989	18.6692	288.117	0.294465	0.0649294	0.708641	0.499306	1.84596	0.055773	1.70453	0.0213225	1.62761		404.665	2.80246	399.31	7.81509	368.656	6.97614		101.341	0.221354	3.40078	404.665	8.89566		0.192094	5.69496	2.67094	0.390742	85.0855	56.2118	54.022
33	core	9.82327	739.407	24.9013	381.174	0.292986	0.0653925	0.603377	0.528646	2.76648	0.0586321	2.69987	0.0220284	1.93479		407.475	2.50239	419.322	13.8001	484.857	15.2939		97.1749	0.217798	5	407.475	8.86197		bdl	7.28445	3.94117	0.672863	128.099	84.4784	50.0995
28	core	9.10102	732.759	25.3887	303.173	0.34166	0.0828606	0.62056	0.643785	1.63148	0.0563497	1.50885	0.0255168	1.33152		513.395	3.13265	507.457	10.1919	480.977	9.46876		101.17	-0.0447624	3.33548	513.395	11.1599		bdl	4.19902	4.93402	0.28597	74.9805	23.9474	43.4571
15	rim	49.1173	903.262	306.283	1029.73	0.183094	0.298606	1.57378	4.75588	2.02852	0.115513	1.27989	0.0785946	4.55943		1685.65	23.649	1783.17	23.4572	1899.26	19.6923		94.531	-0.0844581	7.60106	1899.26	45.5478		0.10728	10.1377	4.14353	0.669074	103.175	53.1305	44.8539
KAKAPOTAHI (P52283)
2	rim	5.32142	688.398	34.9759	630.398	0.273326	0.0560423	0.720424	0.43985	1.93892	0.056923	1.80011	0.0182865	1.12463		351.024	2.53841	363.288	10.2025	442.17	11.676		96.624	0.142603	5	351.024	8.47549		bdl	6.48206	4.79684	0.591679	128.898	71.7458	55.3178
43	rim	19.4412	802.98	18.6148	319.27	0.352909	0.0574535	0.970904	0.467674	2.54757	0.0590372	2.3553	0.0196653	2.34347		358.255	3.43421	363.572	11.4436	397.419	11.8817		98.5375	0.532376	7.14705	358.255	8.93902		0.27197	6.21059	3.57102	0.410549	101.573	61.2572	54.9301
1	rim	6.83181	708.554	39.4187	637.431	0.543361	0.0580287	0.945355	0.456276	1.63112	0.0570274	1.32923	0.0185518	1.05485		363.068	3.40982	373.887	10.5481	441.275	11.5647		97.1064	0.157759	5	363.068	9.03225		bdl	19.5715	6.38559	0.827576	160.634	84.2153	61.6995
44	core	6.60529	705.785	18.7758	299.233	0.562789	0.0584751	1.0866	0.431582	2.71515	0.0535292	2.48824	0.0188678	1.86772		365.269	3.93511	348.969	13.3949	242.319	9.48006		104.671	0.302143	6.37716	365.269	9.28927		bdl	9.80888	8.10033	1.37175	146.976	65.9601	62.4197
7	rim	5.28039	687.787	98.8042	1577.95	0.525565	0.058866	1.03747	0.448258	1.79258	0.0552284	1.46185	0.0193135	1.86555		367.377	3.77326	357.023	11.1326	290.608	8.95611		102.9	0.376285	5	367.377	9.2662		bdl	17.6847	6.84301	0.696513	177.722	88.5036	59.0937
38	rim	7.88097	720.464	17.6301	293.128	0.365116	0.0589852	1.12662	0.430956	2.0217	0.0529894	1.67869	0.0198365	1.59639		367.941	4.04978	342.255	8.32147	171.956	4.16044		107.505	0.420477	9.01205	367.941	9.39393		bdl	6.86162	3.4423	0.474346	94.3928	58.6946	60.3436
5	rim	6.01629	698.195	22.5244	369.006	0.416649	0.0591503	1.20873	0.469907	2.15577	0.0576174	1.78503	0.0196192	1.15794		368.949	4.36554	370.144	9.82372	377.855	9.2243		99.6771	0.418452	5	368.949	9.55497		bdl	8.56165	2.97962	0.455887	79.078	46.5664	63.1579
42	rim	4.62158	677.384	20.0369	332.884	0.388514	0.0590799	0.661372	0.43707	1.6613	0.053655	1.52398	0.0176037	1.22388		371.173	2.40181	384.219	6.25934	463.383	6.84591		96.6047	-0.318737	4.22673	371.173	8.88154		bdl	6.47993	3.02371	0.342458	81.6833	48.5931	53.3238
26	rim	3.68647	660.242	56.2794	940.526	0.36503	0.0591412	0.733592	0.439038	1.35342	0.0538407	1.13736	0.017485	1.19939		371.569	2.67739	385.893	6.58566	472.531	7.2269		96.288	-0.324541	10.2025	371.569	8.96868		bdl	7.0519	3.06027	0.311135	118.527	66.6644	51.9185
45	rim	bdl		58.3501	975.541	0.341851	0.0594423	0.792843	0.440228	1.84341	0.0537132	1.6642	0.0178465	1.46934		372.983	2.90697	380.916	8.11512	429.184	8.49117		97.9172	-0.207378	8.16359	372.983	9.07072		bdl	8.69666	3.73115	0.289667	139.095	79.6325	51.3139
28	rim	8.30676	724.924	31.9955	524.472	0.349438	0.0602721	1.52981	0.499367	3.00863	0.06009	2.59067	0.0200121	2.14537		376.023	5.61301	394.118	12.2965	501.543	13.6023		95.4088	0.343001	9.44444	376.023	10.3219		0.223128	9.46738	3.0216	0.398847	82.8339	48.1952	55.2644
4	rim	7.10307	711.772	10.8537	175.897	0.405821	0.060125	0.896133	0.456788	2.44968	0.0551009	2.27988	0.0188365	1.54004		376.379	3.3063	381.932	9.73035	415.516	9.95759		98.5461	0.00175466	5	376.379	9.27954		bdl	4.14793	2.33449	0.33587	57.3573	32.1853	61.4502
34	rim	bdl		60.7928	1019.13	0.304457	0.0600113	0.656305	0.454903	1.31244	0.0549775	1.13656	0.0173562	0.949629		376.98	2.41081	398.488	4.82694	525.073	5.3634		94.6027	-0.352429	7.03157	376.98	9.0128		0.0877375	8.26929	3.37196	0.277944	135.302	79.362	47.0938
14	rim	5.56025	691.88	19.3869	319.826	0.330436	0.0604678	0.920404	0.458387	2.12514	0.0549802	1.91548	0.018011	1.51521		379.33	3.41012	395.038	8.22461	487.886	9.0517		96.0235	-0.233991	5	379.33	9.38032		bdl	4.88941	2.66629	0.271527	76.6651	45.254	51.2397
13	rim	4.34418	672.628	24.1173	394.829	0.333762	0.0607165	0.699468	0.456147	1.74147	0.0544874	1.59482	0.0189105	1.16238		380.086	2.59603	383.03	6.58301	400.664	6.42157		99.2314	-0.0283027	4.33691	380.086	9.13268		bdl	5.57829	3.41375	0.368768	91.8982	53.9289	53.6183
31	rim	7.52446	716.574	22.7483	362.36	0.408707	0.0610716	0.955552	0.473603	2.16198	0.0562438	1.93935	0.0195468	1.46403		381.448	3.5624	384.111	8.85182	399.957	8.58028		99.3068	0.186073	6.0924	381.448	9.48197		bdl	10.4092	4.08619	0.640887	119.03	77.1326	62.4733
27	rim	10.0728	741.61	18.5572	300.721	0.347611	0.0611448	1.06086	0.453054	2.43925	0.0537389	2.19648	0.0187317	1.73836		382.99	3.9623	385.075	9.12473	397.365	8.68301		99.4585	-0.109248	6.66731	382.99	9.67172		bdl	4.49038	4.34652	0.451225	103.243	63.1536	63.4519
16	rim	3.00591	645.289	25.4122	419.326	0.296951	0.0611795	0.821949	0.459402	1.67127	0.054461	1.45518	0.0170024	1.4677		384.67	3.07982	409.629	6.21991	552.655	7.03547		93.9069	-0.504609	5.45671	384.67	9.38147		bdl	4.33974	1.67844	0.175893	67.0801	43.7595	47.6402
24	rim	9.32064	734.826	18.2731	287.956	0.424937	0.0615945	1.12457	0.458191	2.42138	0.0539515	2.14439	0.0187673	1.45793		385.916	4.2309	391.346	9.24858	423.323	9.0505		98.6126	-0.160688	8.46196	385.916	8.4		0.0928922	7.8164	4.70613	0.646062	118.708	74.9213	60.104
18	rim	11.1369	750.526	11.4786	181.236	0.411507	0.061701	0.929916	0.465512	2.38405	0.0547189	2.19521	0.0188654	1.98459		386.437	3.52905	394.655	10.3474	442.9	10.8451		97.9177	-0.126794	3.92809	386.437	9.57622		bdl	4.16633	3.32964	0.444338	83.674	50.1492	63.4013
12	rim	bdl		42.6185	695.503	0.289768	0.0617842	0.723144	0.468612	1.35617	0.0550091	1.14729	0.0184538	1.06434		387.222	2.73031	400.634	5.53185	478.531	5.74256		96.6524	-0.201291	10.182	387.222	9.32882		bdl	6.861	2.86669	0.31472	105.702	65.8554	50.4199
39	core	6.33007	702.312	12.4941	192.784	0.470195	0.0620013	0.949958	0.449403	2.18145	0.0525695	1.96375	0.0193916	1.62082		387.753	3.62916	376.411	10.7534	307.476	8.70102		103.013	0.00852562	5	387.753	7.2		bdl	4.87499	4.29765	0.483821	92.6281	45.9673	57.1956
21	rim	8.78128	729.676	16.8483	266.882	0.372496	0.0620537	0.716332	0.466999	1.80527	0.0545816	1.65707	0.0194147	1.39847		388.124	2.72364	389.408	7.58019	396.827	7.32317		99.6705	-0.00562596	3.43936	388.124	9.34675		bdl	5.41851	3.80779	0.508071	104.288	65.0847	60.7474
17	rim	5.56946	692.011	20.832	336.845	0.291861	0.0621556	0.895925	0.465906	2.13961	0.0543647	1.943	0.019564	1.32901		388.59	3.39258	386.53	7.99561	374.455	7.26123		100.533	0.0348687	5	388.59	9.57314		bdl	4.18423	2.48774	0.29745	73.273	45.9066	50.4649
40	rim	3.97116	665.814	19.9869	315.28	0.335749	0.062901	0.993751	0.464731	2.24991	0.0535849	2.01855	0.0198407	1.43928		393.056	3.82023	384.924	9.65461	336.621	8.14229		102.113	0.0492921	7.20622	393.056	7.6		bdl	6.50154	2.85888	0.34278	87.168	54.5692	58.5888
20	core	9.40757	735.632	12.9712	187.04	0.671387	0.0629529	0.897638	0.468858	1.84528	0.0540162	1.61224	0.0196441	1.38211		393.845	3.53135	394.356	12.4637	397.103	12.1619		99.8703	-0.0748591	4.93555	393.845	7		bdl	7.53096	7.54841	1.33325	127.516	56.3793	63.3862
11	core	4.41282	673.828	30.4206	471.185	0.378613	0.063444	0.799754	0.484211	1.62147	0.0553532	1.41052	0.0194249	1.1372		396.974	3.1006	406.952	7.1169	463.803	7.31238		97.5482	-0.113796	6.68163	396.974	6.2		bdl	6.53148	3.61964	0.329681	101.117	62.5144	50.1643
35	rim	8.06266	722.391	10.7305	163.21	0.378368	0.064495	1.16448	0.492802	3.80838	0.0554173	3.62598	0.0203189	1.54113		402.678	4.57048	403.721	14.1887	409.446	13.8003		99.7415	0.0578945	4.75378	402.678	9.2		bdl	4.72701	2.47977	0.435102	61.4336	36.3764	63.2345
32	rim	6.23532	701.087	26.0775	383.035	0.423567	0.0658567	1.03796	0.482449	2.42211	0.0531313	2.18844	0.0209238	1.40516		410.705	4.18255	393.654	11.7976	294.978	8.8544		104.331	0.110633	7.02337	410.705	8.4		bdl	10.1924	4.0871	0.501141	116.051	69.2012	62.6388
33	core	11.0153	749.543	23.2655	266.078	0.515385	0.0825548	1.12127	0.627706	2.68468	0.0551458	2.43932	0.0253621	1.84047		511.85	5.7809	501.022	23.2199	452.086	20.9881		102.161	-0.100837	4.32975	511.85	11.6		bdl	6.33808	4.16819	0.680126	89.5167	56.7856	66.8971
22	core	4.0786	667.83	39.6781	412.573	0.386288	0.0941157	1.02474	0.743937	1.8385	0.0573288	1.52644	0.0277201	1.72487		581.301	5.75413	582.471	12.1027	586.918	11.2627		99.7992	-0.264984	8.53409	581.301	11.6		bdl	7.8901	2.96392	bdl	87.3665	45.25	49.4452
15	core	11.2058	751.079	235.458	636.707	0.0334747	0.377581	0.903692	7.61091	1.14312	0.146192	0.700039	0.089529	2.66042		2066.29	15.978	2190.79	10.2761	2309.45	6.39356		94.3171	-0.0741923	3.0198	2066.29	15.978		bdl	0.94904	0.579683	0.185893	43.3448	92.6503	42.4946
WHAKAPOAI (P51290)
16	rim	7.42453	715.456	25.6948	453.303	0.211649	0.0584624	0.736818	0.448997	1.48911	0.0557013	1.29405	0.0172843	1.93316		366.976	2.6376	386.426	5.47627	504.453	6.10314		94.9668	-0.198954	6.04594	366.976	8.85584		0.138178	6.21039	1.91696	0.153368	68.9649	48.5372	45.6746
9	rim	6.65685	706.422	26.0267	435.705	0.370267	0.0587084	0.866062	0.440097	1.54215	0.0543684	1.276	0.0187514	1.17876		367.37	3.10949	364.731	6.43012	348.27	5.62869		100.723	0.110893	9.18233	367.37	9.01616		0.0421309	11.3626	2.89737	0.21426	83.2648	42.6557	58.3578
40	rim	12.3308	759.729	29.4541	500.248	0.25808	0.0594695	1.1172	0.449277	2.14457	0.0547922	1.83059	0.0210114	1.50985		370.508	4.03949	349.981	8.42273	216.365	5.09425		105.865	0.522496	9.58497	370.508	9.44291		0.0970712	10.2137	3.39207	0.311168	100.783	60.2105	64.27
32	rim	6.0456	698.587	39.9695	696.14	0.265538	0.0586824	0.658105	0.440173	1.45878	0.054402	1.30189	0.0147498	1.93682		370.528	2.3848	410.651	5.60801	642.805	7.25139		90.2295	-0.817578	6.16095	370.528	8.86264		0.124279	9.86576	3.76509	0.219919	101.865	61.2377	45.5826
39	rim	6.21017	700.759	40.7911	676.27	0.360427	0.0593894	0.74718	0.44097	1.58534	0.0538516	1.39822	0.0191823	1.39482		371.286	2.71752	362.105	6.73843	303.994	5.46447		102.535	0.172976	9.56261	371.286	8.97454		0.543658	17.1331	4.46366	0.372167	114.119	60.116	60.5572
2	rim	4.92461	682.313	19.6585	317.542	0.442847	0.0595208	0.948192	0.449927	2.24931	0.0548242	2.03968	0.0195921	1.31204		371.362	3.46488	358.202	10.232	274.148	7.81003		103.674	0.372273	7.05127	371.362	9.22999		bdl	5.97109	6.92699	0.538986	131.882	60.6349	61.4395
45	rim	bdl		57.0282	1017.38	0.116109	0.0593548	0.645615	0.440014	1.19915	0.0537662	1.01052	0.0178297	1.16633		371.952	2.33487	373.798	3.87614	385.013	3.38996		99.5061	-0.0696703	11.1383	371.952	8.88097		bdl	2.38496	2.86208	bdl	174.635	134.822	47.0144
3	rim	6.22553	700.959	19.8304	324.252	0.407947	0.0594999	0.933094	0.441219	1.95189	0.0537819	1.71442	0.0188697	1.10819		372.221	3.39302	366.002	7.66553	327.094	6.46283		101.699	0.100087	8.2758	372.221	9.22166		bdl	8.81818	2.67526	0.156726	76.252	38.9191	59.6282
24	core	4.09771	668.184	29.8115	406.429	0.435962	0.0660371	1.9893	1.22514	4.42337	0.134554	3.95081	0.0529215	7.92291		375.477	7.82536	403.968	50.2915	570.484	65.1873		92.9471	9.17903	5	375.477	11.6642		0.593979	7.24011	4.77455	0.464984	91.194	44.3408	103.316
8	rim	4.48703	675.108	22.5602	386.038	0.183395	0.0604598	0.973093	0.472208	2.54148	0.0566456	2.34781	0.0208387	2.14508		377.412	3.58293	378.704	9.43834	386.851	9.07534		99.6587	0.274542	5.27494	377.412	9.40365		bdl	4.83692	2.20877	bdl	81.8059	39.4818	47.3761
34	rim	98.67	991.999	27.2432	460.204	0.24858	0.0603815	0.898309	0.445145	1.9672	0.0534684	1.75012	0.0178629	2.32567		378.724	3.32029	384.756	7.47567	420.992	7.41911		98.4323	-0.212171	5.52453	378.724	9.33499		0.428099	3.81218	4.63625	0.185139	170.105	92.6356	51.0762
44	rim	4.69229	678.558	24.1468	419.009	0.147505	0.0605431	0.98947	0.477963	2.42434	0.057257	2.21322	0.0176667	3.87743		379.557	3.67851	405.287	10.008	554.517	12.0656		93.6514	-0.171077	2.6622	379.557	7.4		0.136939	1.75354	2.50114	bdl	107.196	78.9545	44.334
38	rim	4.06213	667.524	21.2643	374.647	0.0722396	0.0608296	1.00862	0.46035	2.03158	0.0548873	1.76352	0.0194442	2.53756		380.569	3.73011	383.115	6.76647	398.332	6.14402		99.3353	0.026938	6.53649	380.569	9.52759		bdl	0.553763	1.38797	bdl	53.243	27.7481	45.1464
7	core	16.1003	784.636	18.9007	303.002	0.372627	0.0610702	1.15193	0.497629	2.26651	0.0590983	1.95196	0.0206672	2.09785		380.77	4.32345	391.461	12.3175	454.943	13.2276		97.2687	0.366869	7.59805	380.77	9.77929		bdl	3.26339	16.0761	0.671432	86.3334	8.73804	60.5496
17	rim	8.92505	731.074	17.5733	279.171	0.454228	0.0609182	0.873165	0.442622	2.02966	0.0526968	1.83224	0.0171696	1.39981		383.77	3.28397	407.572	8.4653	544.618	9.95913		94.16	-0.692465	5.26088	383.77	9.43102		0.132412	8.13538	3.26401	0.216056	84.3192	42.6787	55.7502
11	rim	3.14413	648.542	50.7142	847.806	0.216904	0.0614737	0.707133	0.460493	1.38012	0.0543291	1.1852	0.0189475	1.35481		384.745	2.65097	386.876	5.33313	399.427	4.94755		99.4494	-0.0438217	9.92321	384.745	9.25122		0.343308	10.5658	2.41919	0.208568	98.9839	63.9015	51.674
31	core	bdl		86.0675	1446.45	0.171472	0.0621358	1.07143	0.462285	1.66336	0.0539593	1.27232	0.0170277	1.25394		389.829	4.05607	402.791	5.74289	477.611	5.15944		96.7819	-0.32559	5	389.829	9.85388		1.15516	7.54616	3.7988	0.165392	158.592	93.249	47.7425
26	rim	4.28602	671.599	33.2028	545.343	0.16648	0.0634899	0.687371	0.470515	1.37443	0.0537486	1.19021	0.0190431	1.52494		397.278	2.65615	397.949	5.18117	401.583	4.69262		99.8314	-0.120408	7.92797	397.278	9.52963		bdl	2.03192	3.22449	0.158901	162.148	110.573	51.7966
35	core	7.29986	714.043	9.30707	131.792	0.763614	0.0631004	1.11087	0.450595	2.84883	0.0517909	2.62332	0.018238	1.84132		397.986	4.57654	426.175	21.9036	581.471	27.3621		93.3857	-0.923619	3.23756	397.986	10.2471		bdl	3.08036	7.11444	0.899724	151.527	64.0944	61.4811
6	rim	6.57272	705.38	36.1193	569.553	0.334704	0.0634104	0.701368	0.474677	1.73074	0.0542921	1.58226	0.0170655	2.59987		399.439	2.7497	436.492	7.65882	636.872	9.6449		91.5113	-0.80832	6.29457	399.439	9.60382		0.198547	9.50177	3.55352	0.294306	104.644	56.8541	56.5032
20	core	5.4549	690.359	32.8424	480.375	0.360524	0.0671062	0.648147	0.60719	2.14193	0.0656237	2.04151	0.0236749	2.19875		415.885	2.67542	445.296	11.1221	600.084	13.6517		93.3952	0.693627	5	415.885	9.94717		0.1414	9.30796	3.92738	0.167929	109.003	60.6555	52.8093
15	rim	5.67069	693.448	39.1114	553.137	0.321016	0.0708738	0.966091	0.540347	1.86525	0.0552951	1.59557	0.0194137	1.30421		444.017	4.158	472.85	7.68409	615.167	8.24436		93.9023	-0.609454	8.94879	444.017	11.0415		bdl	8.44863	3.26608	0.182937	103.066	59.4722	51.8953
13	core	3.37886	653.799	10.9536	123.129	0.334703	0.088434	0.876376	0.720106	2.35284	0.0590576	2.18353	0.0257961	1.68521		547.768	4.64465	568.967	12.1418	654.49	12.7528		96.2743	-0.286273	4.00891	547.768	13.4464		bdl	12.1368	1.44269	0.575586	52.4327	40.765	56.6
42	core	10.6194	746.282	35.9533	328.749	0.324244	0.108537	1.14845	0.938818	2.74033	0.0627338	2.48806	0.0328919	1.64386		664.726	7.28181	677.621	14.9806	720.622	14.4593		98.0971	-0.0760425	7.36248	664.726	16.9563		0.198343	3.7795	5.51566	0.408413	84.6562	26.0955	53.8046
33	core	10.7452	747.33	77.4161	692.666	0.143673	0.117172	0.671605	1.11474	1.50356	0.0689999	1.34523	0.028247	1.87696		717.352	4.56757	792.006	8.29565	1008.31	8.63065		90.5741	-0.4564	6.75541	717.352	17.1451		0.105919	2.84857	5.19246	0.315481	129.523	91.6308	41.6519
37	core	7.68656	718.361	88.6046	353.451	0.285033	0.244774	1.06965	3.47237	2.04532	0.102887	1.74332	0.0888755	2.77927		1399.78	13.6556	1450.86	21.3031	1526.47	20.0286		96.4789	0.921433	3.79118	1526.47	45.0354		bdl	10.5856	1.94828	0.134428	59.4689	43.207	57.6725
RADIANT (P23369)
1	rim	3.46722	655.699	40.8774	740.428	0.224395	0.0565392	0.974088	0.441638	2.05453	0.0566521	1.80893	0.0186596	2.20411		353.961	3.40048	363.204	9.75223	422.439	10.4974		97.4549	0.169113	6.77469	353.961	8.13012		0.472667	11.8236	2.13653	0.399746	97.1709	71.4107	42.3164
8	rim	45.0841	893.214	65.9974	1166.29	0.0793013	0.0594421	0.822161	0.574663	2.49822	0.0701161	2.35906	0.0491299	6.03972		365.077	3.01075	364.578	13.9957	361.78	13.663		100.137	1.97712	8.48567	365.077	8.19021		2.65316	12.729	18.1851	1.28209	208.185	64.4047	52.1787
37	rim	27.2253	837.376	68.5503	1224.41	0.0797364	0.0596278	0.679632	0.454818	2.25186	0.0553207	2.14686	0.0247945	3.43779		371.906	2.46651	360.161	7.8638	285.508	6.22648		103.261	0.401174	3.59762	371.906	8.14183		0.196508	2.37849	2.25538	bdl	181.91	164.048	37.8194
40	rim	4.91088	682.095	23.6333	387.095	0.412962	0.0594091	0.536585	0.440522	1.54485	0.053779	1.44866	0.0183188	1.05781		372.453	2.21012	376.537	14.6785	401.503	15.3406		98.9154	-0.116645	2.64102	372.453	8.07882		bdl	14.3295	3.00304	0.857099	120.896	87.184	47.8894
6	rim	bdl		55.798	996.323	0.0909622	0.0596397	0.751641	0.440422	1.21766	0.0535589	0.957987	0.0197252	1.56731		373.147	2.72723	366.493	4.04134	324.941	2.99446		101.815	0.0792606	5	373.147	8.24899		bdl	2.34097	2.28078	bdl	157.19	141.727	41.7277
28	rim	18.6109	798.677	30.8721	525.746	0.251222	0.0597689	0.510601	0.436199	1.41232	0.0529307	1.31679	0.0182653	1.47835		374.57	1.87539	372.507	5.49391	359.974	5.10595		100.554	-0.0964307	3.29362	374.57	8.0367		bdl	2.26178	17.6604	0.633236	150.089	19.6071	49.1276
21	rim	bdl		14.6676	231.373	0.500159	0.0600833	0.610022	0.456142	1.87958	0.0550611	1.77783	0.0193118	1.4333		375.508	2.30696	372.828	10.0463	356.492	9.48965		100.719	0.171014	2.19257	375.508	8.16697		bdl	13.9297	3.10678	0.679598	85.6741	65.0342	51.3512
30	rim	11.0703	749.989	18.7142	298.085	0.484237	0.0599906	0.910958	0.452108	1.78041	0.0546585	1.52971	0.018425	1.75253		375.933	3.46361	383.84	13.7901	431.589	14.7989		97.9402	-0.100016	4.0795	375.933	8.57398		bdl	4.00249	10.9275	0.989658	254.176	114.397	51.4608
18	rim	8.46557	726.539	19.6148	344.889	0.0988747	0.0604336	0.569908	0.43019	1.80588	0.0516274	1.7136	0.0190164	2.08002		378.241	2.09713	363.013	5.75207	267.198	4.21907		104.195	0.00571745	2.77223	378.241	8.1653		bdl	0.807808	6.9047	0.392256	64.3316	7.59281	45.2982
27	rim	15.048	778.211	9.2477	144.645	0.50403	0.0606405	0.634654	0.436371	2.4872	0.0521906	2.40486	0.0188735	1.41769		379.639	2.40066	369.379	10.4753	305.826	8.76527		102.778	-0.0324267	5	379.639	8.27638		bdl	5.06672	5.19292	0.633933	133.897	69.1912	51.3256
12	rim	bdl		13.8533	229.269	0.31492	0.0604979	1.00123	0.436193	3.24448	0.0522923	3.08613	0.0178789	2.33225		379.668	3.71986	381.817	11.5855	394.651	11.4388		99.437	-0.276093	2.53942	379.668	8.75113		bdl	7.43224	2.30077	0.378104	55.3798	43.1166	42.6246
4	rim	bdl		25.6617	416.712	0.282872	0.0614703	0.607801	0.452597	1.47153	0.0534005	1.34015	0.0229131	1.39874		381.735	2.34052	338.772	9.96046	55.5549	1.83646		112.682	0.756849	4.31001	381.735	8.30108		bdl	9.82668	1.79754	0.230026	81.3754	63.9403	46.2398
14	core	bdl		69.4154	1126.79	0.32478	0.0613667	0.489652	0.450915	1.05394	0.0532918	0.933285	0.0190777	0.877702		384.063	1.83689	379.757	4.26376	353.869	3.74153		101.134	-0.03522	7.5317	384.063	8.22071		bdl	14.9598	3.50197	0.492541	177.577	125.555	40.9497
22	rim	bdl		57.5857	983.656	0.144648	0.0614279	0.615316	0.443172	1.25683	0.0523245	1.09591	0.0185316	1.27893		384.617	2.3051	376.899	4.63854	330.019	3.76848		102.048	-0.0841408	9.15931	384.617	8.34895		bdl	11.7211	1.93654	0.231447	89.3763	77.6758	34.3162
20	rim	bdl		21.4784	362.977	0.171988	0.0615274	0.582954	0.451989	1.79775	0.0532792	1.70061	0.0195174	1.59413		384.788	2.18968	376.989	6.45246	329.673	5.52617		102.069	0.03212	3.29005	384.788	8.32126		bdl	4.16058	3.35992	0.767832	201.476	162.619	42.7398
13	rim	4.93088	682.412	70.0032	1206.1	0.0932267	0.0618424	0.506095	0.462137	0.984779	0.054198	0.844782	0.018721	1.53673		386.991	1.9036	388.113	3.42359	394.56	3.04922		99.7109	-0.0454227	7.6036	386.991	8.29532		bdl	6.01305	3.31509	0.281193	153.521	81.3549	38.8444
34	rim	bdl		45.2858	764.158	0.156894	0.0619297	0.638694	0.453015	1.33601	0.0530533	1.17345	0.0191484	1.34952		387.478	2.40668	381.175	4.6755	343.336	3.85878		101.654	-0.0339708	7.4072	387.478	8.43475		bdl	6.89134	2.99231	0.517998	205.193	170.83	38.7964
32	rim	bdl		18.7137	294.878	0.329434	0.0632893	0.7385	0.457455	2.16152	0.0524224	2.03145	0.0185733	1.58643		396.795	2.87429	399.089	8.79816	412.195	8.67133		99.4253	-0.311922	2.55889	396.795	8.76329		bdl	11.6936	1.8832	0.441363	55.09	49.306	43.565
15	core	15.6901	782.173	21.2261	310.68	0.260577	0.0684702	1.59885	0.616988	4.92062	0.0653543	4.65361	0.0274721	6.00285		423.392	6.63773	442.001	23.7405	539.906	26.9006		95.7897	0.856921	7.7343	423.392	11.0494		bdl	2.32597	11.2397	0.58363	166.587	31.8785	46.2961
11	rim	3.8699	663.872	37.7297	519.839	0.156184	0.0753881	0.607401	0.572542	1.79799	0.0550811	1.69229	0.0273236	1.36249		466.812	2.7579	436.674	8.10985	281.054	5.40421		106.902	0.381532	2.34966	466.812	5.6		bdl	5.67397	0.875751	0.191538	42.6472	29.5388	41.0676
25	rim	6.8565	708.852	16.1246	177.595	0.777624	0.0802504	0.795365	0.607208	2.59637	0.0548768	2.47154	0.0245478	1.28506		498.761	3.89155	496.545	13.3998	486.168	12.8046		100.446	-0.238868	3.65423	498.761	7.8		0.135404	17.7075	12.3497	0.855001	122.076	61.9534	87.908
24	core	12.6025	761.719	47.1212	526.115	0.623406	0.0818636	0.842144	0.629582	1.72673	0.0557776	1.50744	0.0264978	1.24139		505.358	4.56188	471.441	25.8726	309.879	18.1466		107.194	0.38503	7.09737	505.358	9.2		bdl	10.6696	4.61011	0.457606	73.0709	36.0422	48.1175
16	core	5.41347	689.755	80.2208	531.287	0.323129	0.148101	0.744399	1.56838	1.0997	0.0768053	0.809447	0.0527893	1.22395		883.487	6.19044	895.151	9.50835	924.152	8.5642		98.697	0.81998	8.29691	883.487	12.4		1.4681	17.1021	4.65191	0.166398	111.188	79.6096	47.9444
17	core	6.92758	709.702	195.104	984.208	0.829205	0.171788	0.511932	1.70614	0.790601	0.0720313	0.602474	0.0517285	0.725418		1022.22	5.07622	1013.11	13.352	993.535	12.7538		100.899	-0.0275465	5	1022.22	10.2		0.100316	28.0504	19.6171	1.62451	195.97	59.5436	43.8045
19	rim	6.5748	705.406	88.4723	447.8	0.711708	0.17605	0.648562	1.78515	1.06307	0.0735423	0.842311	0.0526234	0.943795		1046.83	6.42381	1052.47	12.9641	1064.15	12.2871		99.4633	-0.151722	4.2011	1046.83	12.8		bdl	18.5185	7.80995	0.873161	199.47	117.722	57.5975
35	core	4.74119	679.361	152.336	855.707	0.179817	0.181861	0.575025	2.20919	1.24097	0.0881032	1.09971	0.0596523	1.27365		1074.86	5.73919	1166.85	10.1154	1341.8	9.96354		92.1161	0.229217	2.95967	1074.86	11.4		0.0870329	6.40959	0.700909	bdl	31.0816	44.4278	51.7615
29	rim	7.43436	715.566	128.621	692.627	0.287449	0.184133	0.539597	1.8611	0.942406	0.0733055	0.772635	0.0541206	0.883638		1090.27	5.43449	1073.69	7.26013	1040.27	6.1977		101.544	-0.0753399	1.75679	1090.27	10.8		bdl	18.6311	3.978	0.267641	96.2736	64.5301	50.8316
ROTOPAI (P45972)
21	rim	bdl		8.22261	146.996	0.271981	0.0562453	1.21875	0.442953	6.1328	0.0571176	6.01048	0.0205182	3.72985		350.284	4.36053	337.243	26.7273	248.685	20.3468		103.867	0.71855	1.28434	350.284	8.51016		0.0856977	4.51974	bdl	bdl	13.1043	22.1861	41.5682
35	rim	17.1961	790.97	12.0355	222.554	0.0776667	0.0571664	1.01022	0.501719	4.38335	0.0636529	4.26535	0.0380502	4.43096		353.74	3.50295	348.614	16.7075	314.932	15.0807		101.47	1.32784	2.08759	353.74	8.16935		0.273476	1.99453	bdl	bdl	8.01847	25.7926	45.0409
10	rim	bdl		35.3067	578.83	0.562689	0.0568587	0.675783	0.429028	1.29578	0.0547253	1.1056	0.0183876	1.16518		355.513	2.3694	348.539	6.56191	302.664	5.53783		102.001	0.282607	6.83522	355.513	7.78647		0.120595	16.6986	6.88152	1.508	108.49	74.8733	51.5458
7	rim	bdl		9.74465	168.568	0.340275	0.0570984	0.793234	0.418712	2.53516	0.0531851	2.40787	0.0190965	2.03148		357.047	3.00259	342.107	17.9623	242.255	13.1964		104.367	0.260941	2.95597	357.047	8.03158		bdl	4.86001	0.7678	0.300078	21.4592	28.622	49.5629
11	rim	7.68648	718.36	48.6003	844.896	0.326306	0.057256	0.6863	0.420244	1.57275	0.0532328	1.41511	0.0181634	1.24448		358.661	2.41764	352.586	6.53758	313.06	5.6095		101.723	0.0731249	6.09457	358.661	7.86375		0.111029	17.8909	4.86406	1.04354	134.274	89.3046	55.9937
24	rim	bdl		7.94491	139.676	0.248336	0.0577434	1.5476	0.507556	4.19062	0.0637499	3.89438	0.0208602	2.77789		359.664	5.62706	386.535	24.6273	550.586	31.8333		93.0482	0.631834	2.68966	359.664	9.37929		0.207263	4.23322	0.509665	bdl	11.1437	20.3024	45.4222
28	rim	7.94421	721.139	9.5146	143.275	0.800507	0.0582306	1.16859	0.471728	4.34005	0.0587542	4.17977	0.018998	2.25449		363.104	4.37969	368.011	24.1906	398.795	25.5203		98.6668	0.493776	2.5432	363.104	8.75051		0.195747	9.30646	2.8402	0.889954	57.1603	47.9068	60.5191
9	rim	3.37116	653.632	19.4347	321.44	0.45022	0.0581534	0.736665	0.435596	2.13754	0.0543259	2.00659	0.0184796	1.34231		364.021	2.6477	361.988	9.02063	349.278	8.47084		100.562	0.102961	3.10934	364.021	8.04302		bdl	10.8571	2.10887	0.521752	59.4645	53.9869	51.0407
16	rim	17.2345	791.186	54.7885	923.957	0.389399	0.0581217	0.737226	0.429648	1.4938	0.0536133	1.29921	0.0177636	1.15214		364.697	2.63764	370.045	6.51067	403.455	6.53689		98.5549	-0.142537	7.96863	364.697	8.05304		0.127004	2.98791	27.1947	0.495089	288.7	52.6443	49.5765
34	rim	bdl		9.29665	165.681	0.178787	0.05834	1.11541	0.435021	5.39283	0.0540807	5.27622	0.0177889	5.15839		365.793	3.99558	370.555	17.7245	400.184	18.514		98.7151	-0.0763464	1.29464	365.793	8.61438		bdl	2.01842	bdl	bdl	5.5348	19.1632	44.7098
15	rim	bdl		9.45252	170.499	0.125484	0.0584744	0.7426	0.414007	2.51916	0.05135	2.40722	0.018289	2.41914		366.307	2.65073	351.264	7.89263	253.37	5.72068		104.282	0.00966724	5	366.307	8.08905		bdl	1.51657	bdl	bdl	3.43756	12.2505	49.2333
33	rim	bdl		9.16791	149.97	0.402159	0.059096	0.891408	0.483176	3.55746	0.0592988	3.44397	0.0212597	2.36127		367.349	3.9662	361.613	33.8573	325.272	30.8159		101.586	0.771671	5	367.349	8.62961		bdl	5.5093	0.817713	0.267615	22.334	29.6057	45.0625
18	rim	bdl		11.3185	186.36	0.37315	0.0592775	1.04428	0.495424	3.21596	0.0606157	3.04169	0.0215458	2.56428		367.786	4.36739	360.838	32.3048	316.714	28.748		101.925	0.954553	2.50355	367.786	8.82911		0.154714	6.43814	1.29101	0.464839	26.1811	31.8847	49.1151
29	rim	6.11408	699.497	9.61085	153.854	0.346888	0.0602848	1.76048	0.611679	5.63514	0.0735893	5.35309	0.0290502	5.44069		368.219	6.44202	362.659	29.8413	327.547	26.9254		101.533	2.49156	3.92123	368.219	10.0258		0.225658	6.30763	0.899841	0.280658	19.8433	29.4121	49.3474
26	rim	10.279	743.396	120.6	2122.16	0.167395	0.0591984	0.4621	0.434317	1.14032	0.0532102	1.04249	0.0188407	1.41877		370.52	1.6942	362.997	5.52015	315.613	4.73696		102.072	0.063549	8.05248	370.52	7.91379		0.111131	19.0464	5.60204	0.546796	194.978	134.248	45.5543
39	core	20.6308	808.89	9.55124	155.101	0.436926	0.0593562	0.916583	0.427179	2.72784	0.0521967	2.56924	0.0189216	2.18515		371.452	3.36564	357.522	11.749	268.411	8.92766		103.896	0.071025	3.11135	371.452	3.36564		bdl	2.40027	8.64181	0.737787	199.631	104.439	59.7513
2	rim	bdl		70.426	1270.42	0.0599273	0.0595928	0.632109	0.431083	1.11184	0.0524645	0.914677	0.019519	1.62994		373.028	2.29211	362.229	3.52927	294	2.47722		102.981	0.0333853	5	373.028	8.11315		bdl	0.84932	3.35004	bdl	237.382	205.517	42.6147
23	rim	11.4487	753.005	25.7573	387.282	0.621118	0.0606068	0.586041	0.536859	2.35262	0.0642448	2.27846	0.0218605	1.48345		373.63	2.70165	358.398	24.0895	261.323	18.2973		104.25	1.54245	1.83126	373.63	8.2501		1.4445	18.6586	4.08214	0.933948	80.0552	65.2477	53.8822
25	rim	8.42614	726.14	53.0843	892.725	0.290893	0.0597803	0.467919	0.442598	1.02933	0.053697	0.916827	0.0188694	1.16221		374.139	1.71875	369.976	4.59022	344.254	4.09556		101.125	0.0411558	4.60797	374.139	7.99281		0.157831	15.7146	4.18705	0.603522	121.718	75.6598	52.0449
1	rim	bdl		16.7709	263.085	0.557257	0.0597695	0.850449	0.435048	1.76006	0.0527905	1.54096	0.0182853	1.85573		374.53	3.58341	371.073	24.5418	349.824	23.1808		100.932	-0.0842304	4.04644	374.53	8.59645		bdl	7.54034	2.03021	0.635449	43.0644	35.2712	54.4926
22	rim	bdl		11.9092	196.032	0.387538	0.0598025	1.28272	0.462735	3.16431	0.0561192	2.89266	0.0172609	2.62579		376.146	4.73444	409.753	13.1556	603.647	16.7487		91.7981	-0.473218	2.54293	376.146	9.16521		bdl	7.19532	2.37801	0.474098	44.8727	34.1553	50.1353
36	core	34.093	861.604	14.5115	191.414	1.18745	0.0606444	0.676375	0.507713	2.69192	0.0607193	2.60556	0.01984	1.10029		376.237	2.83487	371.403	20.7223	341.743	19.1976		101.302	0.896716	2.7393	376.237	2.83487		0.456702	22.3783	7.32063	2.45622	91.3915	56.8426	66.4719
27	rim	bdl		9.56902	156.286	0.319464	0.060508	0.777124	0.457354	2.50047	0.0548199	2.37664	0.021791	4.18446		376.926	2.92858	357.198	12.378	231.39	8.34143		105.523	0.486179	5	376.926	8.39157		bdl	4.20357	0.611842	0.27861	17.9108	27.0592	50.8312
17	rim	bdl		8.22985	129.023	0.462477	0.0608045	1.10808	0.436494	3.47974	0.0520645	3.2986	0.0204234	2.33885		378.721	4.73453	342.078	34.8333	101.122	11.473		110.712	0.485821	2.48397	378.721	9.2113		bdl	6.91102	0.847749	0.257122	27.5763	30.1967	52.5389
19	rim	bdl		14.93	223.271	0.628792	0.0609703	0.845108	0.450161	2.67258	0.0535485	2.53545	0.0203184	1.9245		379.523	3.36694	348.97	19.4179	151.132	9.14076		108.755	0.540157	3.03529	379.523	8.60426		bdl	11.5231	1.76191	0.531107	45.684	43.5949	51.49
32	rim	bdl		9.05643	132.635	0.605098	0.0621624	1.3222	0.565684	4.18177	0.0660002	3.96723	0.0234921	3.42676		381.673	5.40576	358.728	34.9145	213.365	22.0509		106.396	1.87826	2.40131	381.673	9.62453		0.14716	8.60783	1.39035	0.453781	33.657	39.8933	53.6216
8	rim	4.79676	680.265	16.6019	226.12	0.995163	0.0615068	0.855141	0.482721	3.40485	0.0569209	3.29572	0.0195536	1.97065		384.121	4.22214	390.832	37.6981	430.512	40.5842		98.283	0.177004	2.04337	384.121	9.05826		0.24609	14.7515	5.77454	1.76801	95.4857	64.758	65.8912
13	core	11.5163	753.535	18.4682	292.024	0.375136	0.0620939	0.813282	0.466723	2.24048	0.0545141	2.08766	0.0195628	1.44755		388.191	3.10655	386.749	9.87526	378.375	9.34186		100.373	0.0415273	2.48702	388.191	3.10655		0.34254	12.2801	6.20083	1.26052	100.818	52.8075	64.6697

## Sheet: Table S2
			2011-05-18
			selected date	±1se
			405.598	8.74821
			402.21	8.79192
			416.868	9.24091
			419.317	9.68349
			423.854	9.63865
			415.12	9.43449
			427.364	9.57677
			416.931	8.97454
			420.735	9.23956
			413.863	8.90532
			417.672	9.36306
			420.495	9.23118
			411.39	9.11935
			2011-05-19
			415.71	9.9405
			416.415	10.1652
			422.573	10.2842
			421.868	10.2818
			425.042	10.3763
			433.203	10.5082
			419.466	10.2411
			416.848	10.2826
			427.984	10.2684
			409.036	10.2651
			412.997	9.99717
			408.837	10.0852
			419.338	10.3411
			406.094	9.97646
			R33 secondary standard
